# Supplementary material
Source: MDPI journal article supplement (https://www.mdpi.com/2673-8007/1/1/4)
Supplement: s1 [file s1]

### Supplemental Data

**Table S1.** Physicochemical parameters measured in water and solvent controls, and chlorothalonil treatments.

| Parameter               | Treatment   |             |             |             |
|-------------------------|-------------|-------------|-------------|-------------|
|                         | WC          | SC          | Low         | High        |
| Temperature (°C)        | 21.89 ±0.26 | 21.78 ±0.37 | 21.83 ±0.36 | 22.02 ±0.18 |
| pH                      | 7.70 ±0.12  | 7.58 ±0.09  | 7.49 ±0.10  | 7.53 ±0.06  |
| Dissolved oxygen (mg/L) | 2.22 ±0.49  | 1.55 ±0.48  | 1.76 ±0.56  | 2.04 ±0.11  |

WC = water control; SC = solvent control; Low = low concentration; High = high concentration of chlorothalonil; ± = standard deviation

**Table S2.** Sample size of tadpoles per experimental treatment. Numbers in parentheses represent the number of samples that successfully passed the lab procedures for 16S rRNA gene sequencing and subsequent quality filtering and were used in downstream analyses.

| Treatment                         | Number of tadpoles |
|-----------------------------------|--------------------|
| Negative control (filtered water) | 20 (12)            |
| Solvent control (methanol)        | 20 (19)            |
| Low chlorothalonil concentration  | 20 (12)            |
| High chlorothalonil concentration | 20 (16)            |

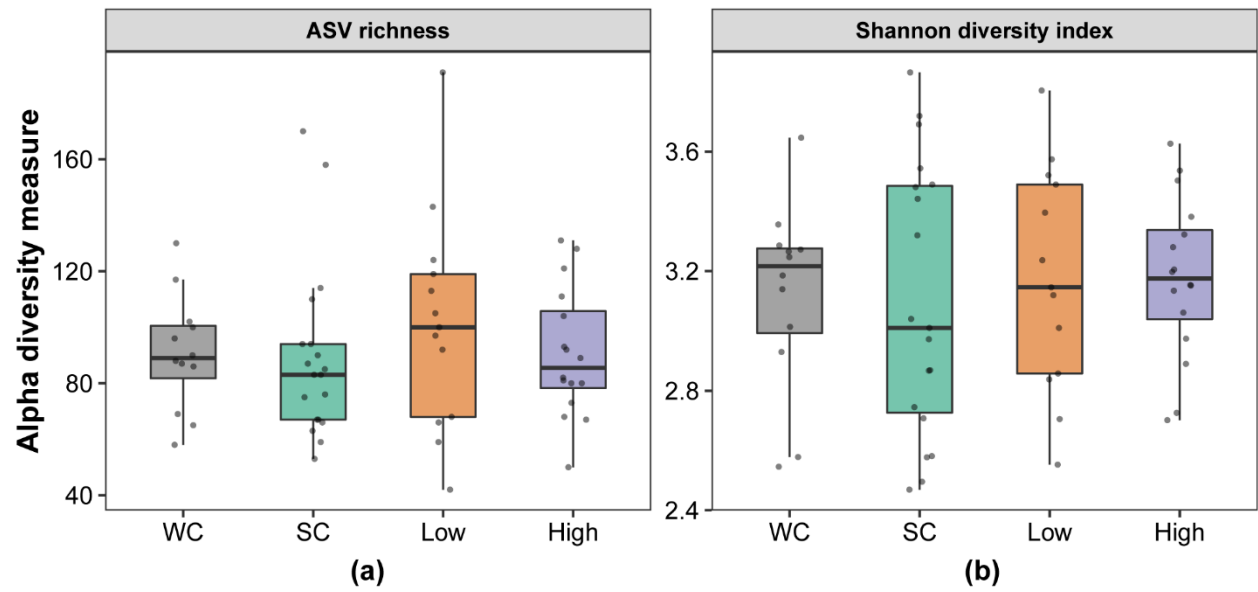

**Figure S1.** Alpha diversity metrics of skin bacterial communities of tadpoles exposed to chlorothalonil. WC = water control; SC = solvent control.

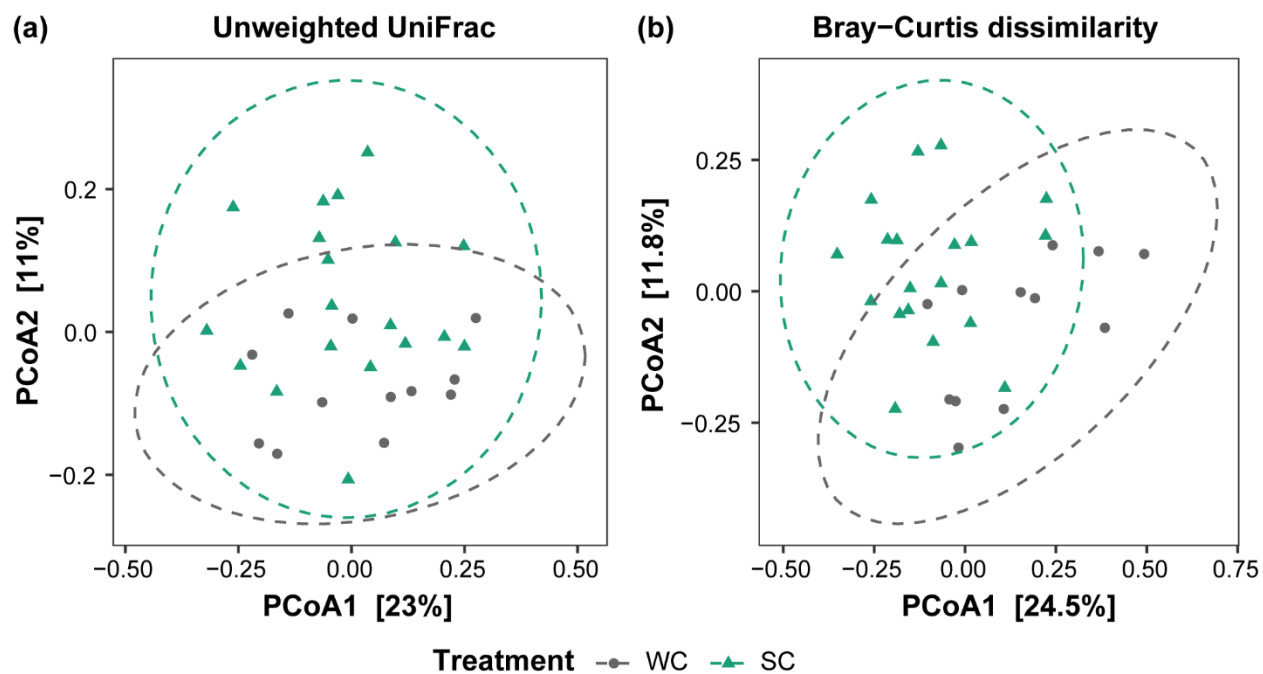

**Figure S2.** Principal coordinate analysis (PCoA) of skin bacterial communities of tadpoles kept in water and solvent controls. Each point represents the skin bacterial community of an individual sample. Colors and shapes indicate different treatment group. WC = water control; SC = solvent control.
